# Supplementary material for: Development and validation of a new set of indicators to assess the quality of maternal and child nutritional care at the primary care
Source: PubMed Central journal article supplement (PMC9769120; doi:10.3389/fmed.2022.1011940), 2022-12-07

## Supplementary Material

**Supplementary Figure 1.** Flowchart of the development of the indicators to evaluate the quality of maternal and child nutritional care in PHC

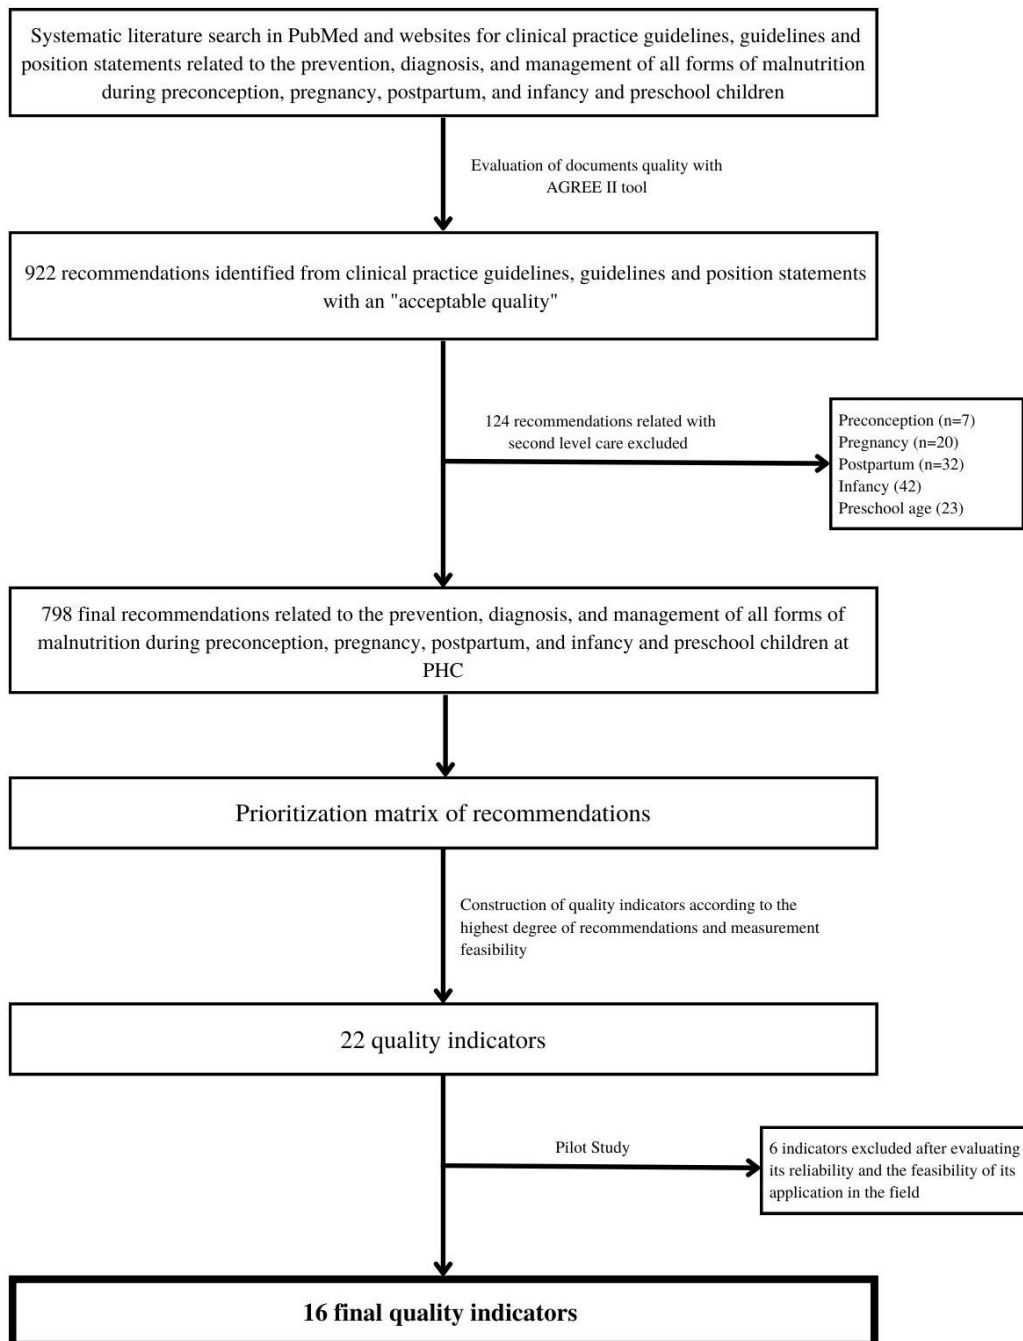

Supplement: Image_1.pdf [file Image_1.pdf]
