# Supplementary material for: Development and validation of a new set of indicators to assess the quality of maternal and child nutritional care at the primary care
Source: PubMed Central journal article supplement (PMC9769120; doi:10.3389/fmed.2022.1011940), 2022-12-07
Supplement: Table_1.pdf [file Table_1.pdf]

## *Supplementary Material*

**Supplementary Table 1.** Search algorithms in Pubmed by life stage

|                      |                                                                                                                                                                                                                                                                                                                                                                                                                                                                                                                                                              |
|----------------------|--------------------------------------------------------------------------------------------------------------------------------------------------------------------------------------------------------------------------------------------------------------------------------------------------------------------------------------------------------------------------------------------------------------------------------------------------------------------------------------------------------------------------------------------------------------|
| <b>Preconception</b> | ("preconception period" OR preconception) AND ("Preconception Care"[Mesh] OR "Nutrition Assessment"[Mesh] OR "Nutrition Therapy"[Mesh] OR "prevention and control" [Subheading] OR "Health Promotion"[Mesh]) AND ("Malnutrition"[Mesh] OR "Body Weight"[Mesh] OR "Anemia"[Mesh] OR "Deficiency Diseases"[Mesh] OR "Nutrition Disorders"[Mesh] OR "Nutritional Physiological Phenomena"[Mesh])                                                                                                                                                                |
| <b>Pregnancy</b>     | ("Pregnancy"[Mesh] OR "Pregnancy Trimester, First"[Mesh] OR "Pregnancy Trimester, Second"[Mesh] OR "Pregnancy Trimester, Third"[Mesh]) AND ("Prenatal Care"[Mesh] OR "Nutrition Assessment"[Mesh] OR "Nutrition Therapy"[Mesh] OR "prevention and control" [Subheading] OR "Health Promotion"[Mesh]) AND ("Malnutrition"[Mesh] OR "Body Weight"[Mesh] OR "Anemia"[Mesh] OR "Deficiency Diseases"[Mesh] OR "Nutrition Disorders"[Mesh] OR "Gestational Weight Gain"[Mesh] OR "Fetal Growth Retardation"[Mesh] OR "Nutritional Physiological Phenomena"[Mesh]) |
| <b>Postpartum</b>    | ("Postpartum Period"[Mesh] OR "postpartum" OR "Lactation"[Mesh]) AND ("Postnatal Care"[Mesh] OR "Nutrition Assessment"[Mesh] OR "Nutrition Therapy"[Mesh] OR "prevention and control" [Subheading] OR "Health Promotion"[Mesh]) AND ("Malnutrition"[Mesh] OR "Body Weight"[Mesh] OR "Anemia"[Mesh] OR "Deficiency Diseases"[Mesh] OR "Nutrition Disorders"[Mesh] OR "Nutritional Physiological Phenomena"[Mesh])                                                                                                                                             |
| <b>Infancy</b>       | ("infant"[MeSH Terms] OR "Infant, Newborn"[Mesh]) AND ("Nutrition Assessment"[Mesh] OR "Nutrition Therapy"[Mesh] OR "prevention and control" [Subheading] OR "Health Promotion"[Mesh]) AND ("Infant Nutrition Disorders"[Mesh] OR "Malnutrition"[Mesh] OR "Body Weight"[Mesh] OR "Anemia"[Mesh] OR "Deficiency Diseases"[Mesh] OR "Nutritional Physiological Phenomena"[Mesh]) NOT ("Nutritional Support"[Mesh])                                                                                                                                             |
| <b>Preschool age</b> | ("Child, Preschool"[Mesh]) AND ("Nutrition Assessment"[Mesh] OR "Nutrition Therapy"[Mesh] OR "prevention and control" [Subheading] OR "Health Promotion"[Mesh]) AND ("Child Nutrition Disorders"[Mesh] OR "Body Weight"[Mesh] OR "Growth Disorders"[Mesh] OR "Deficiency Diseases"[Mesh] OR "Nutritional Physiological Phenomena"[Mesh]) NOT ("Nutritional Support"[Mesh])                                                                                                                                                                                   |
